# Supplementary material
Source: publisher figshare collection journal article supplement (https://acs.figshare.com/ndownloader/files/14303201)
Supplement: Supplementary file 1 [file 14303201]

## Supporting information:

### Stoichiometric control over ferroic behavior in $\text{Ba}(\text{Ti}_{1-x}\text{Fe}_x)\text{O}_3$ nanocrystals

Julien Lombardi<sup>1,2,3</sup>, Long Yang,<sup>4</sup> Frederick A. Pearsall,<sup>1,2,3</sup> Nasim Farahmand,<sup>1,2,3</sup> Zheng Gai<sup>5</sup>, Simon J. L. Billinge<sup>4</sup> and Stephen O'Brien<sup>1,2,3\*</sup>

<sup>1</sup>The CUNY Energy Institute, City University of New York, Steinman Hall, 160 Convent Avenue, The City College of New York, New York, NY 10031, USA.

<sup>2</sup>Department of Chemistry, The City College of New York, 1024 Marshak, 160 Convent Avenue, NY 10031, USA

<sup>3</sup> Ph.D. Program in Chemistry, The Graduate Center of the City University of New York, New York, NY 10016, USA.

<sup>4</sup>Department of Applied Physics and Applied Mathematics, Columbia University, 500 West 120<sup>th</sup> Street, New York, NY 10025, USA.

<sup>5</sup>Center for Nanophase Materials Sciences and Chemical Science Division, Oak Ridge National Laboratory, Oak Ridge, TN 37831, USA

\*Corresponding author: [sobrien@ccny.cuny.edu](mailto:sobrien@ccny.cuny.edu)

#### **EDS Figure S1.**

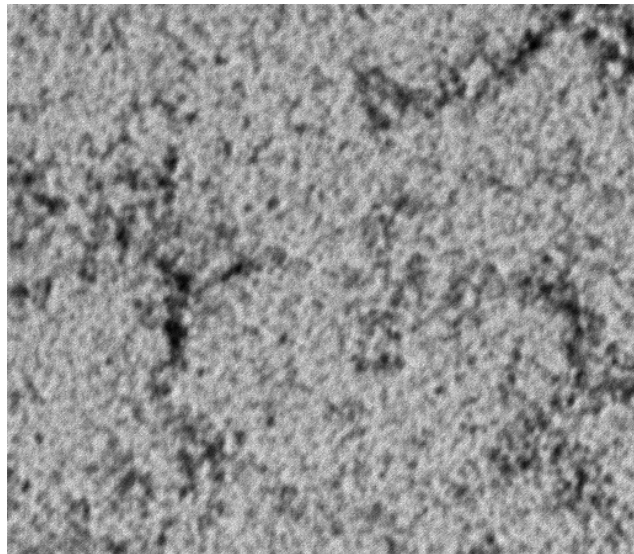

**Figure S1.** Image used for EDS analysis shown in Figure 4(d).

The Iron doped  $\text{BaFe}_x\text{Ti}_{1-x}\text{O}_3$  ( $x = 0, 0.1, 0.2, 0.3, 0.5, 0.75, 1.0$ ) gel-collected perovskite nanoparticles were studied using X-ray pair distribution function (PDF) analysis at room temperature.<sup>1,2</sup> The sample information is listed in Table I. We sought (a) to determine whether these samples have a non-centrosymmetric structure (b) to establish that Fe was being incorporated into the structure (c) to look for any structure changes with increased Fe content.

| # | Sample Name | Composition                                    |
|---|-------------|------------------------------------------------|
| 1 | BTO         | $\text{BaTiO}_3$                               |
| 2 | BFT 1       | $\text{BaFe}_{0.1}\text{Ti}_{0.9}\text{O}_3$   |
| 3 | BFT 2       | $\text{BaFe}_{0.2}\text{Ti}_{0.8}\text{O}_3$   |
| 4 | BFT 3       | $\text{BaFe}_{0.3}\text{Ti}_{0.7}\text{O}_3$   |
| 5 | BFT 5       | $\text{BaFe}_{0.5}\text{Ti}_{0.5}\text{O}_3$   |
| 6 | BFT 75      | $\text{BaFe}_{0.75}\text{Ti}_{0.25}\text{O}_3$ |
| 7 | BFO         | $\text{BaFeO}_3$                               |

### The PDF Method

The PDF method is a total scattering technique for determining local order in nanostructured materials.<sup>1,2</sup> The technique does not require periodicity, so it is well suited for studying nanoscale features in a variety of materials.<sup>3,4</sup> The experimental PDF, denoted  $G(r)$ , is the truncated Fourier transform of the total scattering structure function,  $F(Q) = Q[S(Q) - 1]$ , according to<sup>5</sup>:

$$(1) \quad G(r) = \frac{2}{\pi} \int_{Q_{min}}^{Q_{max}} F(Q) \sin(Qr) dQ,$$

where  $Q$  is the magnitude of the scattering momentum transfer. The structure function,  $S(Q)$ , is extracted from the Bragg and diffuse components of x-ray, neutron or electron powder diffraction intensity. For elastic scattering,  $Q = 4\pi \sin\theta/\lambda$ , where  $\lambda$  is the scattering wavelength and  $2\theta$  is the scattering angle. In practice, values of  $Q_{min}$  and  $Q_{max}$  are determined by the experimental setup and  $Q_{max}$  is often reduced below the experimental maximum to eliminate noisy data from the PDF since the signal to noise ratio becomes unfavorable in the high- $Q$  region.

The PDF gives the scaled probability of finding two atoms in a material a distance  $r$  apart and is related to the density of atom pairs in the material.<sup>1</sup> For a macroscopic scatterer,  $G(r)$  can be calculated from a known structure model according to

$$(2) \quad G(r) = 4\pi r [\rho(r) - \rho_0], \quad \rho(r) = \frac{1}{4\pi r^2 N} \sum_i \sum_{j \neq i} \frac{b_i b_j}{\langle b \rangle^2} \delta(r - r_{ij}).$$

Here,  $\rho_0$  is the atomic number density of the material and  $\rho(r)$  is the atomic pair density, which is the mean weighted density of neighbor atoms at distance  $r$  from an atom at the origin. The sums in  $\rho(r)$  run

over all atoms in the sample,  $b_i$  is the scattering factor of atom  $i$ ,  $\langle b \rangle$  is the average scattering factor and  $r_{ij}$  is the distance between atoms  $i$  and  $j$ .

In practice, we use Eqs. 2 to fit the PDF generated from a structure model to a PDF determined from experiment. For this purpose, the delta functions in Eqs. 2 are Gaussian-broadened and the equation is modified to account for experimental effects. PDF modeling, where it is carried out, is performed by adjusting the parameters of the structure model, such as the lattice constants, atom positions, and isotropic atomic displacement parameters, to maximize the agreement between the theoretical and an experimental PDF. This procedure is implemented in the PDFgui program<sup>6</sup>. Least-squares fits were performed by minimizing the fit residual, with the goodness-of-fit  $R_\omega$ , given by:

$$(3) \quad R_\omega = \sqrt{\frac{\sum_{i=1}^n [G_{obs}(r_i) - G_{calc}(r_i, P)]^2}{\sum_{i=1}^n G_{obs}(r_i)^2}},$$

where  $G_{obs}$  and  $G_{calc}$  are the experimental and calculated PDFs and  $P$  is the set of parameters refined in the model.

| Sample<br>Phase                     | BTO     | BFT1    |        | BFT2    |        | BFT3    |        |
|-------------------------------------|---------|---------|--------|---------|--------|---------|--------|
|                                     | NT      | NT-BFTO | BCO    | NT-BFTO | BCO    | NT-BFTO | BCO    |
| $a$ (Å)                             | 4.0170  | 4.0232  | 5.2954 | 4.0271  | 5.3173 | 4.0270  | 5.3228 |
| $b$ (Å)                             | -       | -       | 9.0207 | -       | 9.0409 | -       | 9.0111 |
| $c$ (Å)                             | 4.0424  | 4.0564  | 6.3406 | 4.0683  | 6.3673 | 4.0753  | 6.4076 |
| Ba $z$                              | -0.0011 | -0.0081 | -      | -0.0077 | -      | -0.0068 | -      |
| Ti (Fe) $z$                         | 0.5328  | 0.5283  | -      | 0.5282  | -      | 0.5282  | -      |
| O1 $z$                              | -0.0180 | -0.0228 | -      | -0.0267 | -      | -0.0245 | -      |
| O2 $z$                              | 0.4756  | 0.4867  | -      | 0.5009  | -      | 0.5059  | -      |
| Ba $U_{iso}$ (Å <sup>2</sup> )      | 0.0083  | 0.0104  | 0.0104 | 0.0117  | 0.0117 | 0.0128  | 0.0128 |
| Ti (Fe) $U_{iso}$ (Å <sup>2</sup> ) | 0.0099  | 0.0108  | -      | 0.0121  | -      | 0.0124  | -      |
| O $U_{iso}$ (Å <sup>2</sup> )       | 0.0255  | 0.0266  | 0.0266 | 0.0249  | 0.0249 | 0.0236  | 0.0236 |
| SPD (Å)                             | 132.4   | 80.8    | -      | 65.4    | -      | 55.2    | -      |
| Mass Ratio (%)                      | -       | 96.4    | 3.6    | 96.1    | 3.9    | 95.7    | 4.3    |
| $\delta_1$ (Å)                      | 1.57    | 1.59    | -      | 1.57    | -      | 1.55    | -      |

|              |       |       |       |       |
|--------------|-------|-------|-------|-------|
| $R_{\omega}$ | 0.118 | 0.138 | 0.141 | 0.150 |
|--------------|-------|-------|-------|-------|

Table S1: Structure refinement results of NT-BFTO+BCO model fit to the low-doped  $\text{BaFe}_x\text{Ti}_{1-x}\text{O}_3$  ( $x = 0.1, 0.2, 0.3$ ) sample PDFs, i.e. BFT1 to BFT3, over a range of  $1.5 < r < 50 \text{ \AA}$ . The model is introduced in Section II. In NT-BFTO model, the occupancies on the Ti and Fe sites are fixed during the refinement keeping the total site occupancy as 1.0. The occupancies on the Fe site are fixed as 0.1, 0.2, and 0.3 for BFT1, BFT2, and BFT3, respectively. The ADPs of Ba and O ions are constrained to be the same in two phases. Here,  $R_{\omega}$  is the goodness of fit;  $x, y$  and  $z$  are the refinable atomic positions in fractional coordinates (see Table II for details);  $U_{iso}$ , in units of ( $\text{\AA}^2$ ), is the isotropic atomic displacement parameter (ADP);  $\delta_l$  in units of ( $\text{\AA}$ ) is a correlated motion related PDF peak sharpening coefficient; SPD, in units of ( $\text{\AA}$ ), is the spherical particle diameter. The refinement result from the undoped BTO sample is listed together for easier comparison.

## References

- <sup>1</sup> Egami, T., Billinge, S. J. L. *Underneath the Bragg Peaks: Structural Analysis of Complex Materials*, 2<sup>nd</sup> ed.; Elsevier: Amsterdam, 2003.
- <sup>2</sup> Billinge, S. J. L.; Levin, I. The Problem with Determining Atomic Structure at the Nanoscale. *Science* **2007**, 316, 561.
- <sup>3</sup> Billinge, S. J. L. Nanoscale Structural Order from the Atomic Pair Distribution Function (PDF): There's Plenty of Room in the Middle. *J. Solid State Chem.* **2008**, 181 (7), 1695–1700.
- <sup>4</sup> Billinge, S. J. L.; Kanatzidis, M. G. Beyond Crystallography: The Study of Disorder, Nanocrystallinity and Crystallographically Challenged Materials with Pair Distribution Functions. *Chem. Commun.* **2004**, 0 (7), 749–760.
- <sup>5</sup> Farrow, C. L.; Billinge, S. J. L. Relationship between the Atomic Pair Distribution Function and Small-Angle Scattering: Implications for Modeling of Nanoparticles. *Acta Cryst A* **2009**, 65 (3), 232–239.
- <sup>6</sup> Farrow, C. L.; Juhas, P.; Liu, J. W.; Bryndin, D.; Božin, E. S.; Bloch, J.; Proffen, T.; Billinge, S. J. L. PDFfit2 and PDFgui: Computer Programs for Studying Nanostructure in Crystals. *J. Phys.: Condens. Matter*, **2007**, 19, 335219.
